# Supplementary material
Source: publisher figshare collection journal article supplement (https://diabetesjournals.figshare.com/ndownloader/files/24173042)
Supplement: Supplementary file 1 [file 24173042]

**Supplemental materials:** Improved Time-in-Range over 1 year is Associated with Reduced Albuminuria in Individuals with Sensor-Augmented Insulin Pump-Treated Type 1 Diabetes

**Supplementary Figure 1: Scatter plot of the relationship of change in time-in-range and change in urine albumin-creatinine-ratio from baseline to study end**

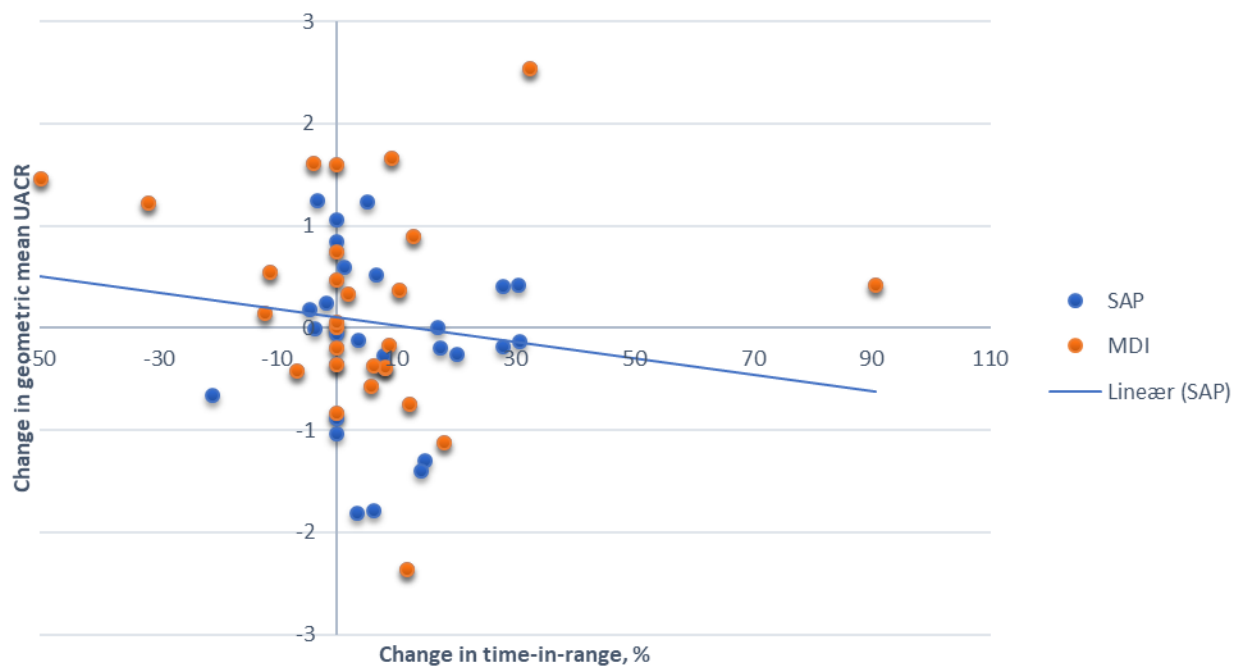

Scatter plot showing the relationship of change in time-in-range (TIR) and change in urine-albumin-creatinine- ratio (UACR) from baseline to study end for 55 participants with type 1 diabetes and albuminuria assigned to multiple daily injection therapy (MDI) or sensor-augment insulin pump therapy (SAP). The linear regression analysis showed that there was a significant relationship between the changes in UACR with the changes in %TIR ( $R=-0.03$  and  $p=0.04$ )

**Supplemental materials:** Improved Time-in-Range over 1 year is Associated with Reduced Albuminuria in Individuals with Sensor-Augmented Insulin Pump-Treated Type 1 Diabetes

**Supplementary Table 1. Associations of changes in urine albumin-creatinine-ratio with quartile changes of time-in-range from baseline to study end.**

| Change in TIR |             | Change in UACR (%) |                     |       | P-value |
|---------------|-------------|--------------------|---------------------|-------|---------|
| Quartile      | Range (%)   | Median             | Interquartile range |       |         |
| 1             | < -3.19     | 14.9               | -30.0               | 188.2 | 0.50    |
| 2             | - 3.2 - 6.6 | -0.12              | -43.8               | 81.4  |         |
| 3             | 6.6-14.8    | -23.6              | -52.6               | 68.5  |         |
| 4             | >14.8       | -14.3              | -22.3               | 51.3  |         |

The median changes in urine-albumin creatine ratio (UACR) stratified by the quartiles of change of time-in-range (TIR) from baseline to study end for 55 participants with type 1 diabetes and albuminuria assigned to multiple daily injection therapy (MDI) or sensor-augment insulin pump therapy (SAP). P values were calculated using a one-way analysis of variance (ANOVA).

**Supplemental materials:** Improved Time-in-Range over 1 year is Associated with Reduced Albuminuria in Individuals with Sensor-Augmented Insulin Pump-Treated Type 1 Diabetes

**Supplementary figure 2. Changes in time in range, urine albumin-creatinine-ratio and glycated hemoglobin A1c for 12 months after initiation of sensor-augmented insulin pump.**

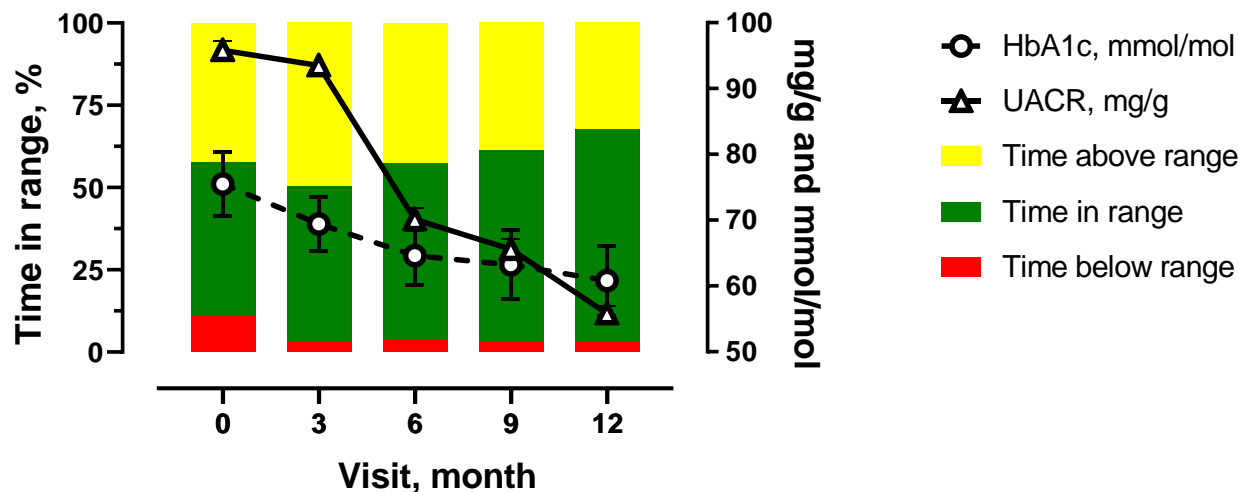

Twenty-six participants with type 1 diabetes were assigned to sensor-augmented insulin pump treatment for 12 months. The data from the continuous glucose monitors (CGM) were uploaded for each 3-month visit, showing the mean percentage of time spent above range >10.0 mmol/l (upper yellow bar), time within range of 3.9-10.0 mmol/l (middle green bar); and time below range <3.9 mmol/l (lower red bar). The corresponding glycated hemoglobin A1c (HbA<sub>1c</sub>: solid line with white circles) and the urine albumin-creatinine-ratio (UACR: dotted line with white triangles) are shown as mean (95% CI).

**Supplemental materials:** Improved Time-in-Range over 1 year is Associated with Reduced Albuminuria in Individuals with Sensor-Augmented Insulin Pump-Treated Type 1 Diabetes

**Supplementary Table 2. Associations of changes in metrics with changes in urine albumin-creatinine-ratio**

| Variable                    | Change of           | Unadjusted change of<br>UACR (95%CI) | P-value           |                       |                       |
|-----------------------------|---------------------|--------------------------------------|-------------------|-----------------------|-----------------------|
|                             |                     |                                      | Unadjusted        | Adjusted <sub>1</sub> | Adjusted <sub>2</sub> |
| <b>TIR<sub>3,9-10</sub></b> | 10 %                | 18.6 (9.5;27.9) %                    | <b>0.0006</b>     | <b>0.021</b>          | <b>0.038</b>          |
| <b>Mean<sub>SG</sub></b>    | 1 mmol/l            | - 2.6 (-5.9;8.5) %                   | 0.54              | 0.35                  | <b>0.031</b>          |
| <b>CV<sub>SG</sub></b>      | 1 %                 | 0.53 (-0.98;2.5) %                   | 0.51              | 0.17                  | 0.250                 |
| <b>GMI<sub>SG</sub></b>     | 10 mmol/mol         | -5.50 (-3.3;1.1)                     | 0.66              | 0.29                  | <b>0.031</b>          |
| <b>HbA1c</b>                | 10 mmol/mol         | -18.1 (-8.2;29.6) %                  | <b>0.02</b>       | <b>0.02</b>           | 0.071                 |
| <b>BMI</b>                  | 1 kg/m <sup>2</sup> | -3.6 (-4.0;4.3) %                    | 0.38              | 0.79                  | 0.830                 |
| <b>MAP</b>                  | 10 mmHg             | -22.1 (-33.0;-11.2) %                | <b>&lt;0.0001</b> | <b>0.0001</b>         | <b>&lt;0.0001</b>     |

The association of changes in time-in-range (TIR), mean sensor glucose (Mean<sub>SG</sub>), coefficient of variance sensor glucose (CV<sub>SG</sub>), glucose management index (GMI<sub>SG</sub>), glycated hemoglobin A<sub>1c</sub> (HbA<sub>1c</sub>), body mass index (BMI), mean arterial pressure (MAP) with the geometric mean changes in urine albumin-creatinine-ratio(UACR) (95% confidence interval) during the study. P values were calculated using a linear mixed model with participant-specific intercept as a random effect and time from baseline as a fixed effect. Unadjusted and adjusted (BMI and MAP) without (1) and with (2) HbA<sub>1c</sub>.

**Supplemental materials:** Improved Time-in-Range over 1 year is Associated with Reduced Albuminuria in Individuals with Sensor-Augmented Insulin Pump-Treated Type 1 Diabetes

**Supplementary Table 3. The changes in urine-albumin creatine ratio per change in glycemic metrics for persons using multiple daily injections and sensor-augmented insulin pump**

| MDI and SAP<br>(n=55)                        | Unadjusted change in UACR |        |       |            | Adjusted change in UACR |        |       |            |
|----------------------------------------------|---------------------------|--------|-------|------------|-------------------------|--------|-------|------------|
|                                              | Mean<br>(%)               | 95% CI |       | p<br>value | Mean<br>(%)             | 95% CI |       | p<br>value |
| <b>TIR (Per 10%)</b>                         | -5.95                     | -13.25 | 1.39  | 0.11       | -6.98                   | -15.61 | 0.07  | 0.052      |
| <b>TAR (Per 10%)</b>                         | 6.89                      | -2.51  | 16.37 | 0.15       | 9.39                    | -0.79  | 19.68 | 0.07       |
| <b>%CV (Per 1%)</b>                          | -0.47                     | -2.27  | 1.37  | 0.61       | -0.41                   | -2.22  | 1.44  | 0.66       |
| <b>GMI<sub>SG</sub> (Per 1<br/>mmol/mol)</b> | 1.38                      | -0.69  | 3.50  | 0.19       | 2.00                    | -0.30  | 4.36  | 0.09       |
| <b>HbA1c (Per 1<br/>mmol/mol)</b>            | 0.06                      | -0.87  | 0.99  | 0.91       | -1.04                   | -2.57  | 0.57  | 0.20       |

The mean changes (%) in urine-albumin creatine ratio (UACR) per 10% increase in time-in-range (TIR) and time-above-range, per 1% increase in %CV, per 1 mmol/mol in GMI and HbA1c for 55 participants with type 1 diabetes and albuminuria assigned to multiple daily injection therapy (MDI) or sensor-augment insulin pump therapy (SAP) for one year. P values were calculated using a linear mixed model with participant-specific intercept as a random effect and time from baseline, intervention (SAP or MDI) as a fixed effect. The model was either unadjusted or adjusted for changes in HbA<sub>1c</sub>.
